# Supplementary material for: In Vitro Hypocholesterolemic Effect of Coffee Compounds
Source: PubMed Central journal article supplement (PMC7071201; doi:10.3390/nu12020437), 2020-02-09
Supplement: nutrients-12-00437-s001.pdf [file nutrients-12-00437-s001.pdf]

## Supplementary material

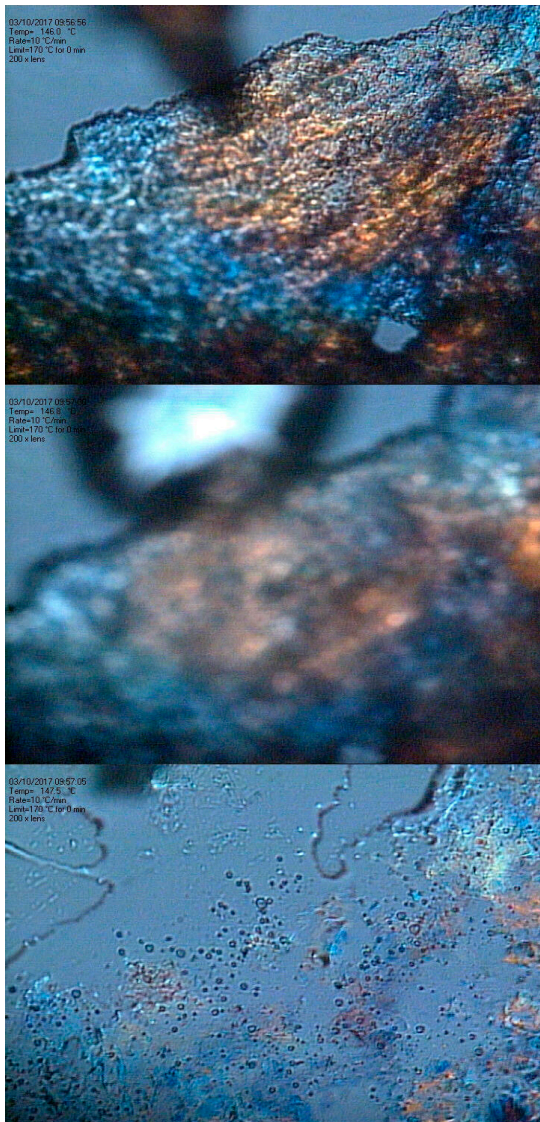

**Figure S1.** Polarized light thermal microscope photograph showing the transition temperature observed for the crystals obtained in the intestinal model containing coffee extracts
